# Supplementary material for: Evaluation of electrosynthesized reduced graphene oxide–Ni/Fe/Co-based (oxy)hydroxide catalysts towards the oxygen evolution reaction
Source: publisher site journal article supplement (doi:10.3762/bjnano.14.34), 2023-03-29
Supplement: Additional file 1 [file 2190-4286-14-34-S1.pdf]

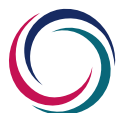

## Supporting Information

for

### **Evaluation of electrosynthesized reduced graphene oxide–Ni/Fe/Co-based (oxy)hydroxide catalysts towards the oxygen evolution reaction**

Karolina Cysewska, Marcin Łapiński, Marcin Zajac, Jakub Karczewski, Piotr Jasiński and Sebastian Molin

*Beilstein J. Nanotechnol.* **2023**, *14*, 420–433. doi:10.3762/bjnano.14.34

## Additional figures

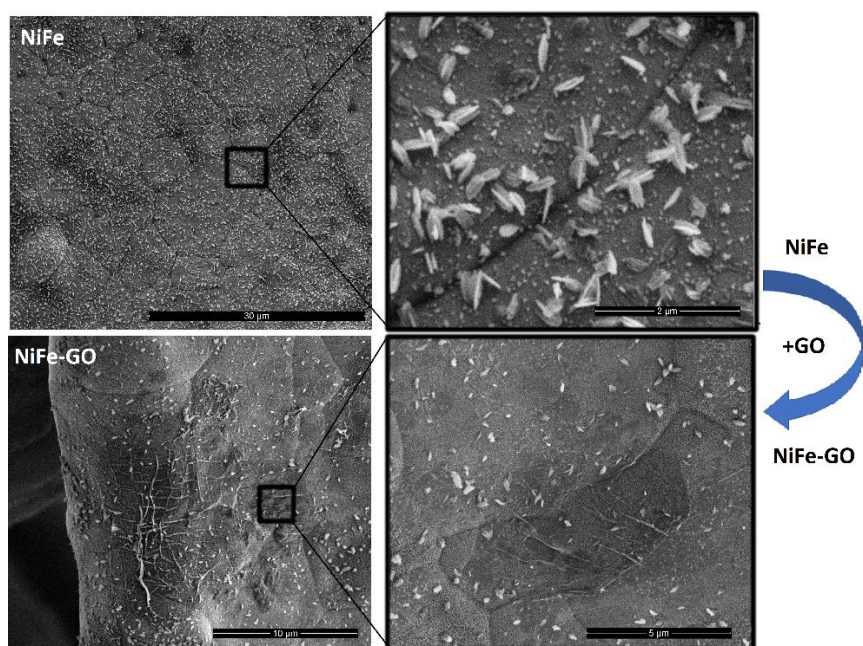

**Figure S1:** SEM images of NiFe and NiFe-GO.

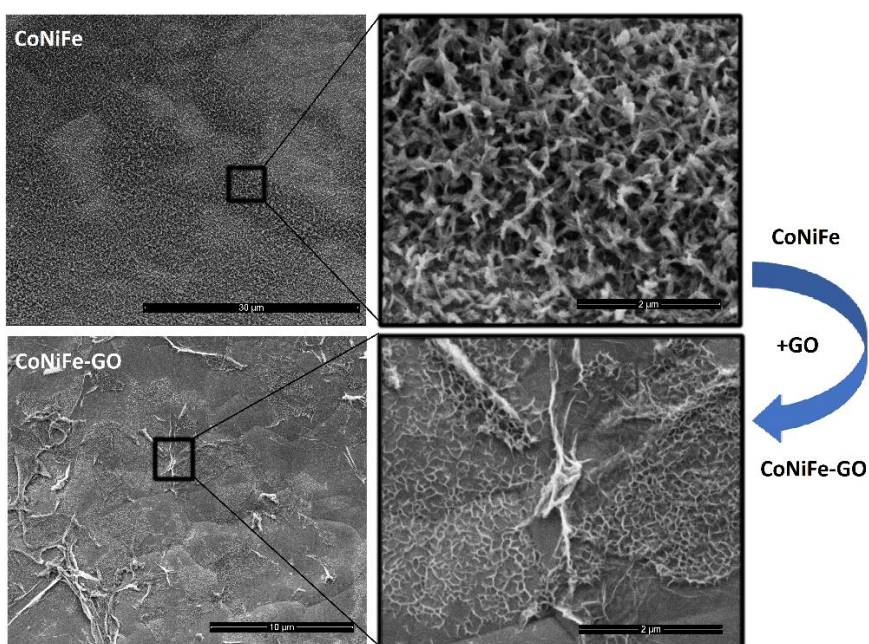

**Figure S2:** SEM images of CoNiFe and CoNiFe-GO.

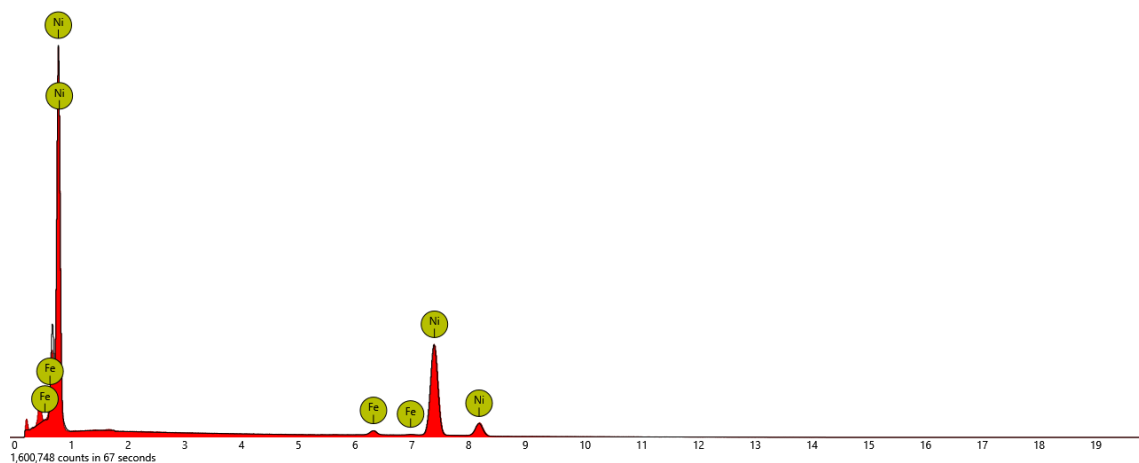

**Figure S3:** The content of the elements detected in NiFe-GO during EDX mapping.

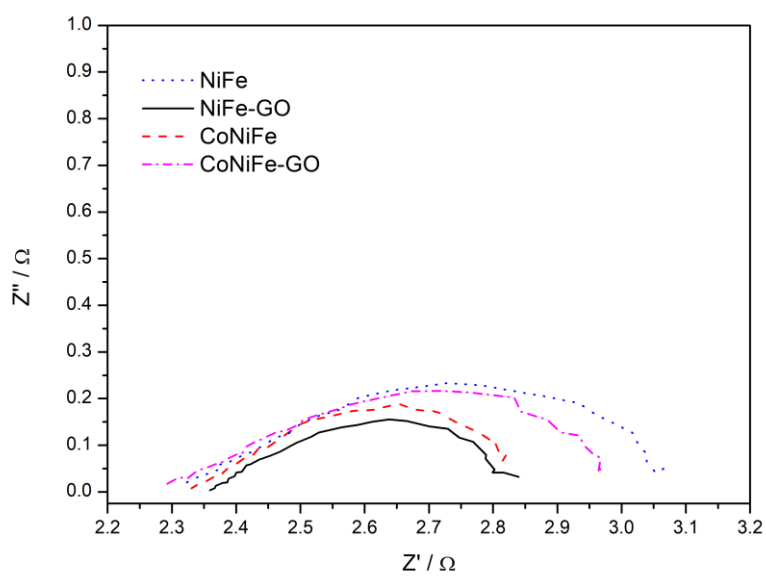

**Figure S4:** EIS spectra recorded at 1.6 V vs RHE in aqueous solution of 1 M KOH.

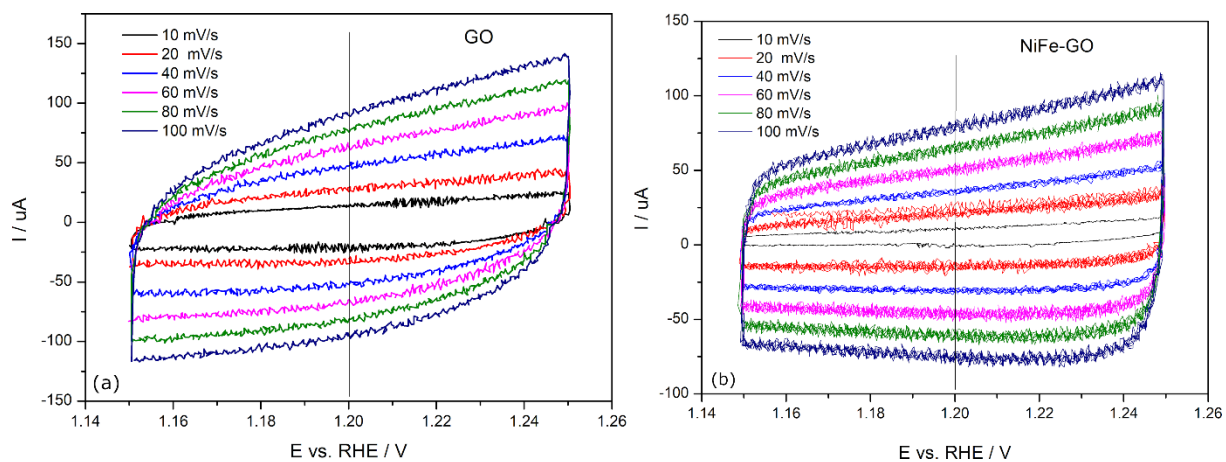

**Figure S5:** The example of cyclic voltammograms recorded during sweeping the potential from 1.15 to 1.25 V vs RHE with a scan rate of 10, 20, 40, 60, 80, and 100  $\text{mV} \cdot \text{s}^{-1}$  in aqueous solution of 1 M KOH for GO (a) and NiFe-GO (b). Similar graphs were obtained for the rest of the studied samples.
